# Supplementary material
Source: PubMed Central journal article supplement (PMC7017918)
Supplement: NIHMS1554981-supplement-SI.pdf [file NIHMS1554981-supplement-SI.pdf]

## Supporting Information

for

### Synthesis of Pyridylimido Complexes of Tantalum and Niobium by Reductive Cleavage of the N=N Bond of 2,2'-Azopyridine: Precursors for Early-Late Heterobimetallic Complexes

Kento Kawakita,<sup>a</sup> Yuya Kakiuchi,<sup>a</sup> Evan P. Beaumier,<sup>b</sup> Ian A. Tonks,<sup>\*b</sup>

Hayato Tsurugi,<sup>\*a</sup> and Kazushi Mashima<sup>\*a</sup>

<sup>a</sup>*Department of Chemistry, Graduate School of Engineering Science, Osaka University, Toyonaka, Osaka 560-8531, Japan*

<sup>b</sup>*Department of Chemistry, University of Minnesota—Twin Cities, 207 Pleasant Street SE, Minneapolis, Minnesota 55455, United States*

#### Contents:

|                                                                                  |    |
|----------------------------------------------------------------------------------|----|
| 1. Electrochemical Analyses of Complexes <b>2a</b> and <b>2b</b> .....           | S2 |
| 2. van't Hoff Plot .....                                                         | S3 |
| 3. <sup>1</sup> H and <sup>13</sup> C NMR Spectra of Complexes .....             | S4 |
| 4. Molecular Structures of Complexes <b>2b</b> , <b>4b</b> , and <b>5b</b> ..... | S6 |
| 5. X-ray Crystallographic Analysis .....                                         | S8 |

## 1. Electrochemical Analyses of Complexes **2a** and **2b**

In an argon-filled glovebox, complex **2a** (8.3 mg, 0.010 mmol) was dissolved in CH<sub>2</sub>Cl<sub>2</sub> (2 mL) and an electrolyte ([<sup>n</sup>Bu<sub>4</sub>N][BAr<sup>F</sup><sub>4</sub>] (Ar<sup>F</sup> = 3,5-(CF<sub>3</sub>)<sub>2</sub>C<sub>6</sub>H<sub>3</sub>), 221 mg, 0.20 mmol) was added. The solution which contained 1 mM of **2a** and 0.1 M of [<sup>n</sup>Bu<sub>4</sub>N][BAr<sup>F</sup><sub>4</sub>] was used for measurement of cyclic voltammogram with a glassy carbon working electrode, a platinum wire auxiliary electrode, a silver wire electrode, and scan rate of 100 mV/s. In a similar manner, cyclic voltammogram of complex **2b** was measured.

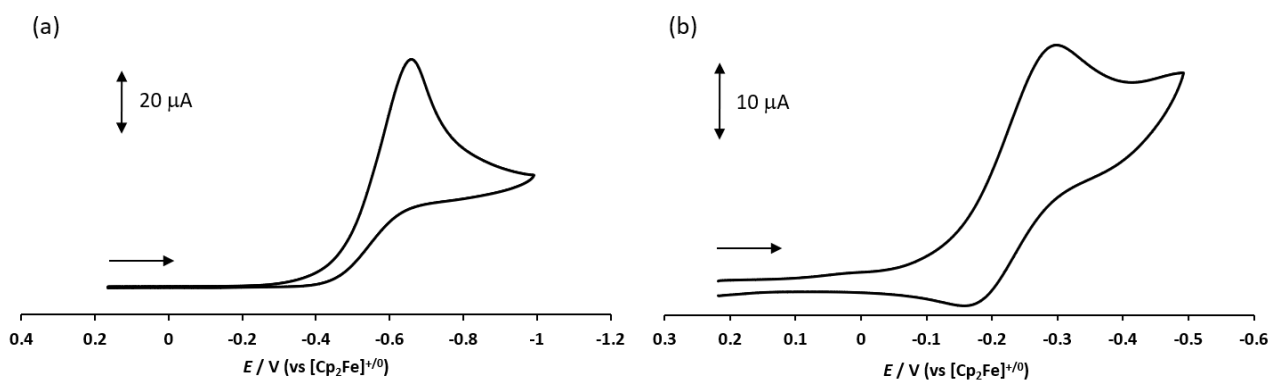

**Figure S1.** Cyclic voltammograms of (a) **2a** and (b) **2b**.

## 2. van't Hoff Plot

The relative concentrations of the equilibrium species were determined by  $^1\text{H}$  NMR analysis in  $\text{CD}_2\text{Cl}_2$ . Figure S2 shows a standard van't Hoff plot for the temperature range from 263 to 303 K for **4a** and 243 to 303 K for **4b**, giving  $\Delta H = -5.3(2)$  kcal mol $^{-1}$ ,  $\Delta S = -9.5(8)$  e.u.,  $\Delta G_{303\text{K}} = -2.4(5)$  kcal mol $^{-1}$  for **5a**;  $\Delta H = -7.2(4)$  kcal mol $^{-1}$ ,  $\Delta S = -17(2)$  e.u.  $\Delta G_{303\text{K}} = -2.1(9)$  kcal mol $^{-1}$  for **5b**.

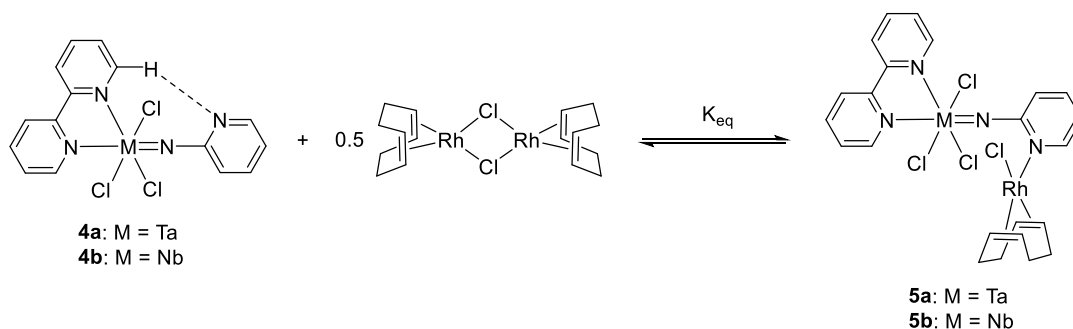

$$K_{eq} = \frac{[5]}{[4][\text{RhCl}(\text{cod})]_2^{0.5}}$$

$$\ln K_{eq} = -\frac{\Delta H}{RT} + \frac{\Delta S}{R}$$

$$\Delta G = T\Delta H - \Delta S$$

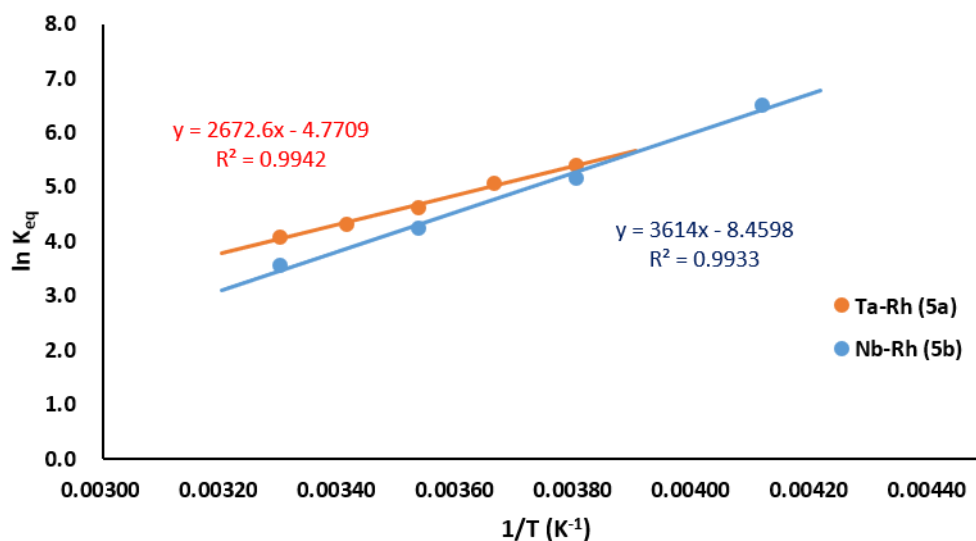

**Figure S2.** van't Hoff plot for the equilibria between (bipy)MCl $_3$ ( $\mu$ -Npy)RhCl(cod) (**5a**: M = Ta, **5b**: M = Nb) and a mixture of M(=Npy)Cl $_3$ (bipy) (**4a**: M = Ta, **4b**: M = Nb) and [RhCl(cod)] $_2$ .

### 3. $^1\text{H}$ and $^{13}\text{C}$ NMR Spectra of Complexes **2b**, **4a**, **5a**, and **5b**

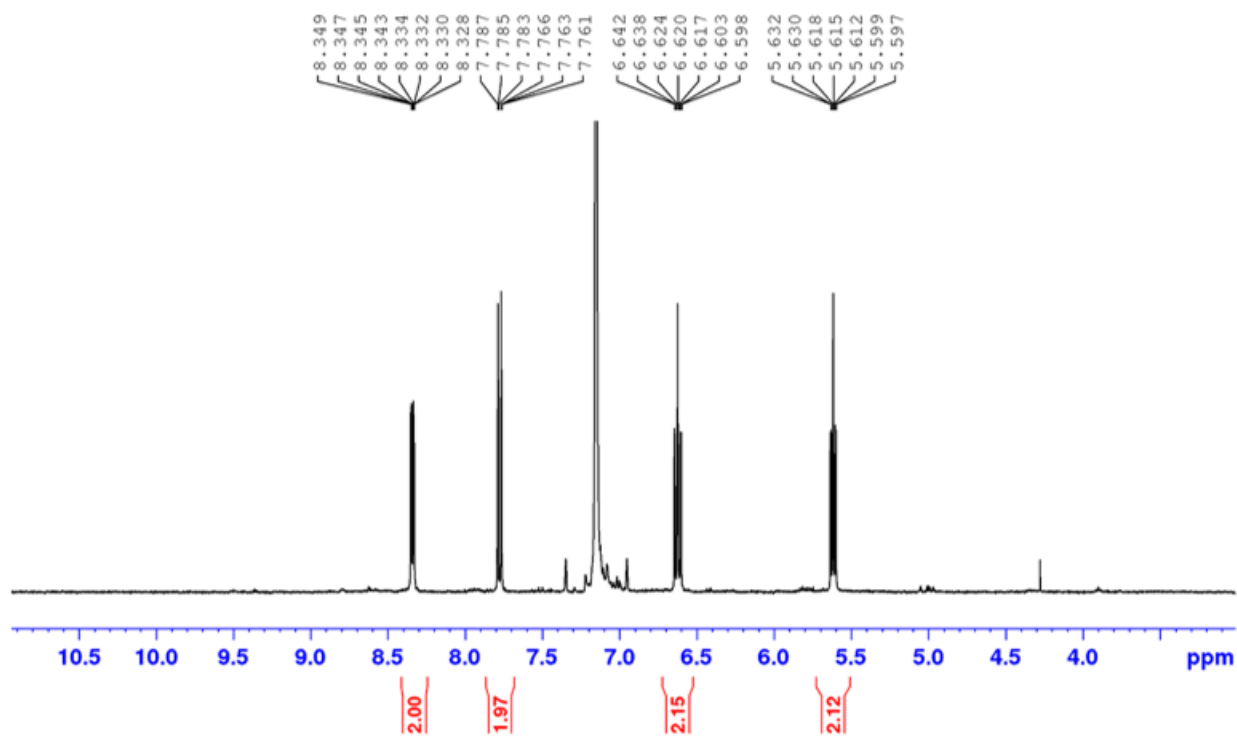

**Figure S3.**  $^1\text{H}$  NMR spectrum of complex **2b** in  $\text{C}_6\text{D}_6$  at 303 K.

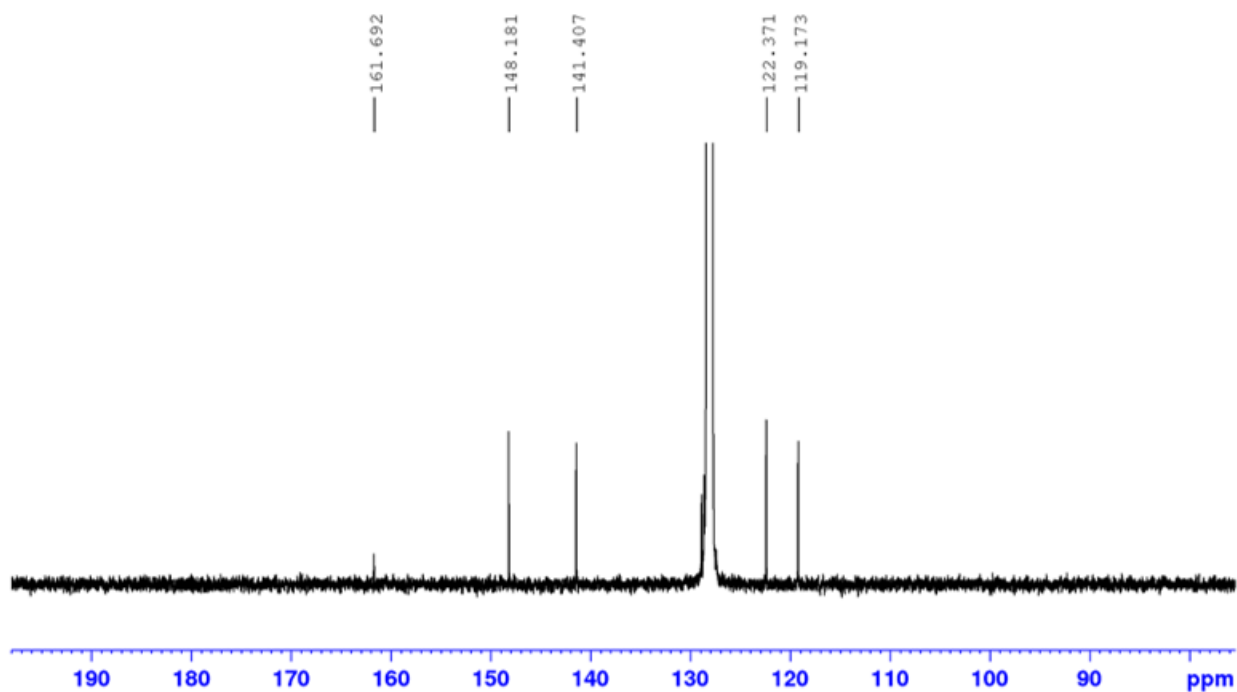

**Figure S4.**  $^{13}\text{C}$  NMR spectrum of complex **2b** in  $\text{C}_6\text{D}_6$  at 303 K.

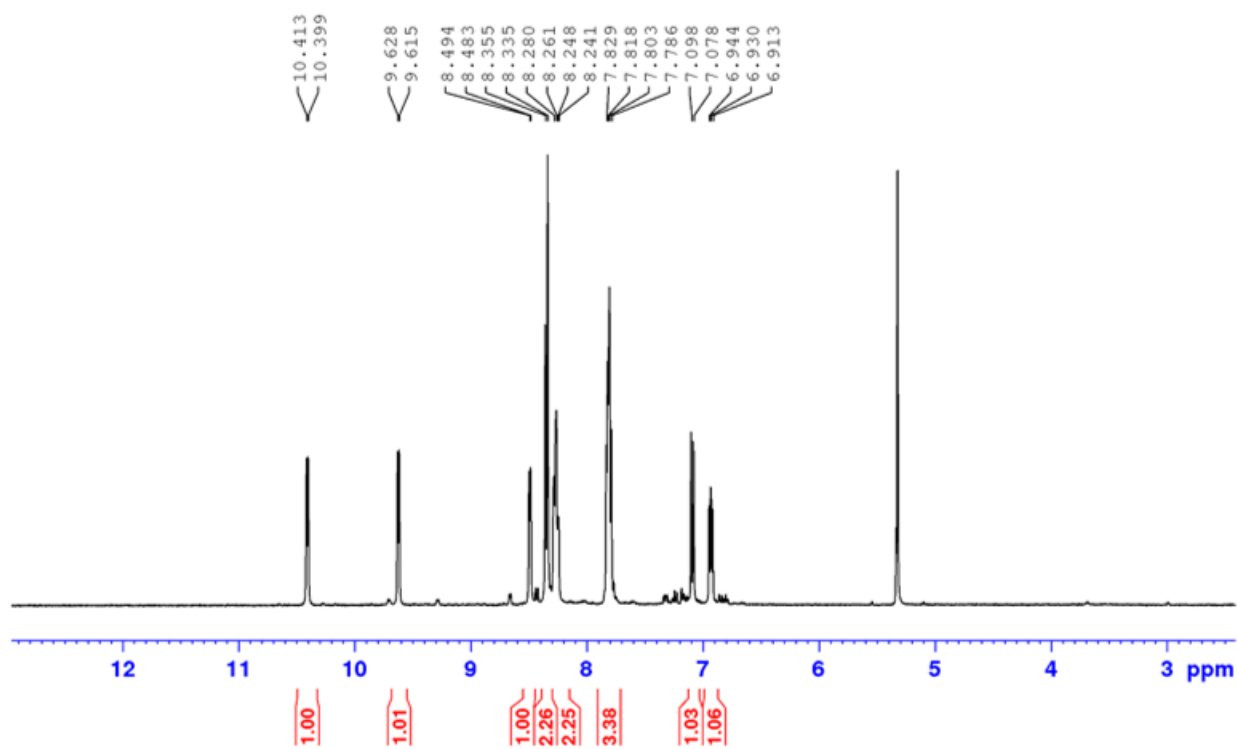

**Figure S5.**  $^1\text{H}$  NMR spectrum of complex **4a** in  $\text{CD}_2\text{Cl}_2$  at 303 K.

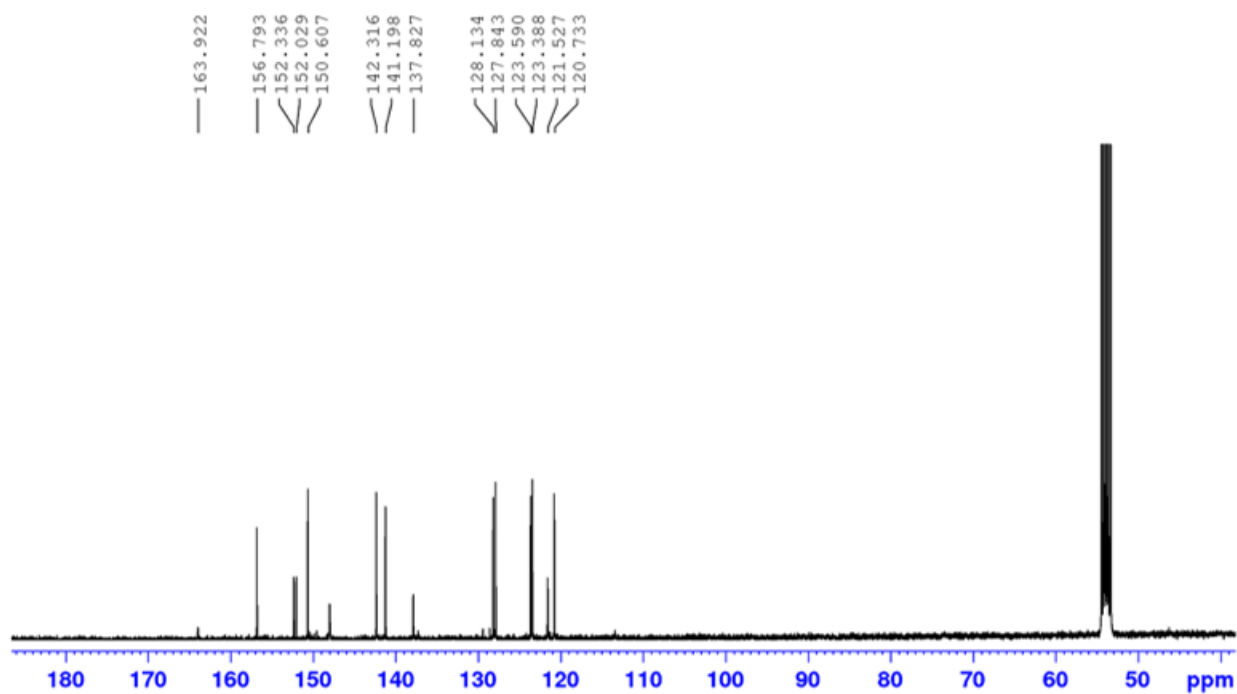

**Figure S6.**  $^{13}\text{C}$  NMR spectrum of complex **4a** in  $\text{CD}_2\text{Cl}_2$  at 303 K.

#### 4. Molecular Structures of Complexes 2b, 4b, and 5b

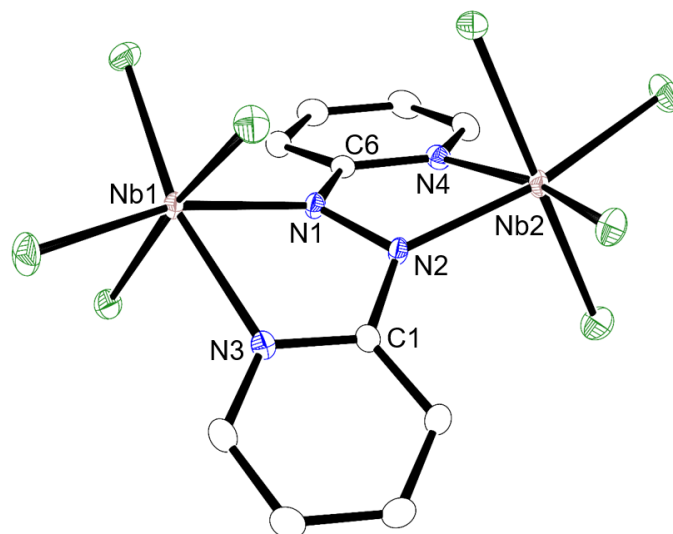

**Figure S7.** Molecular structure of complex **2b** with 50% thermal ellipsoids. All hydrogen atoms and solvent molecules are omitted for clarity. Selected bond distances (Å) and angle (deg): N1—N2, 1.4026(16); C1—N2, 1.3910(19); C6—N1, 1.3935(18); Nb1—N1, 2.0731(12); Nb2—N2, 2.0829(12); Nb1—N3, 2.2255(13); Nb2—N4, 2.2164(12); C1—N2—N1—C6, 33.02.

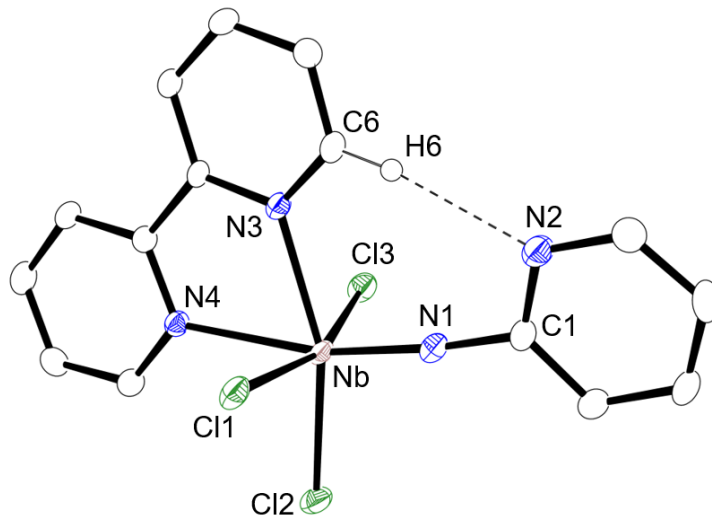

**Figure S8.** Molecular structure of complex **4b** with 50% thermal ellipsoids. All hydrogen atoms are omitted for clarity. Selected bond distances (Å) and angles (deg): Nb—N1, 1.774(2); N1—C1, 1.391(3); Nb—N3, 2.259(3); Nb—N4, 2.370(2); Nb—Cl1, 2.3993(9); Nb—Cl2, 2.3749(9); Nb—Cl3, 2.3922(8); N1—Nb—N4, 167.30(9); N3—Nb—Cl2, 160.57(6); Nb—N1—C1, 174.2(2).

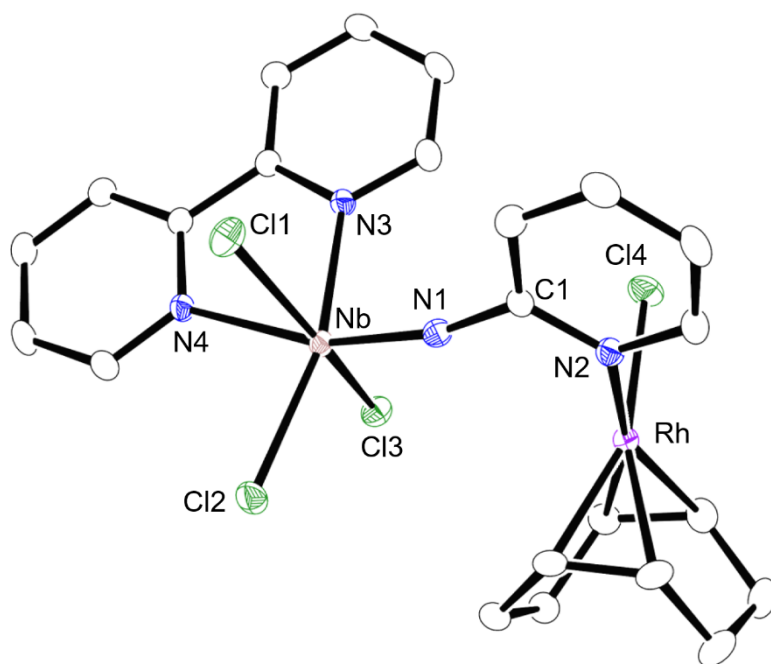

**Figure S9.** Molecular structure of complex **5b** with 50% thermal ellipsoids. All hydrogen atoms and solvent molecules are omitted for clarity. Selected bond distances (Å) and angles (deg): Nb—N1, 1.7804(14); N1—C1, 1.383(2); Nb—N3, 2.2531(14); Nb—N4, 2.3545(14); Nb—Cl1, 2.3876(5); Nb—Cl2, 2.3710(5); Nb—Cl3, 2.4054(5); Rh—N2, 2.0999(15); Rh—Cl4, 2.3909(5); N1—Nb—N4, 163.29(5); Nb—N1—C1, 165.92(12).

## 5. X-ray Crystallographic analysis

**Table S1.** Crystal Data and Data Collection Parameters for **2a**, **2b**, **3a**, **4a**, **4b**, **5a**, and **5b**.

|                                               | <b>2a</b> ·C <sub>6</sub> H <sub>6</sub>                                       | <b>2b</b> ·C <sub>6</sub> H <sub>6</sub>                                       |
|-----------------------------------------------|--------------------------------------------------------------------------------|--------------------------------------------------------------------------------|
| empirical formula                             | C <sub>16</sub> H <sub>14</sub> Cl <sub>8</sub> N <sub>4</sub> Ta <sub>2</sub> | C <sub>16</sub> H <sub>14</sub> Cl <sub>8</sub> N <sub>4</sub> Nb <sub>2</sub> |
| formula weight                                | 907.83                                                                         | 731.75                                                                         |
| crystal system                                | <i>monoclinic</i>                                                              | <i>monoclinic</i>                                                              |
| space group                                   | <i>P2<sub>1</sub>/c</i> (No. 14)                                               | <i>P2<sub>1</sub>/c</i> (No. 14)                                               |
| <i>a</i> , Å                                  | 11.428(5)                                                                      | 11.4367(11)                                                                    |
| <i>b</i> , Å                                  | 16.150(6)                                                                      | 16.1110(14)                                                                    |
| <i>c</i> , Å                                  | 13.616(5)                                                                      | 13.5646(13)                                                                    |
| <i>α</i> , deg.                               | -                                                                              | -                                                                              |
| <i>β</i> , deg.                               | 103.749(4)                                                                     | 103.8899(19)                                                                   |
| <i>γ</i> , deg.                               | -                                                                              | -                                                                              |
| <i>V</i> , Å <sup>3</sup>                     | 2441.0(16)                                                                     | 2426.3(4)                                                                      |
| <i>Z</i>                                      | 4                                                                              | 4                                                                              |
| <i>D</i> <sub>calcd</sub> , g/cm <sup>3</sup> | 2.470                                                                          | 2.003                                                                          |
| <i>μ</i> [Mo- <i>Kα</i> ], mm <sup>-1</sup>   | 69.833                                                                         | 18.378                                                                         |
| <i>T</i> , K                                  | 113(2)                                                                         | 113(2)                                                                         |
| crystal size, mm                              | 0.20 × 0.12 × 0.12                                                             | 0.24 × 0.09 × 0.08                                                             |
| <i>θ</i> range for data collection (deg.)     | 3.12 to 27.48                                                                  | 3.10 to 27.50                                                                  |
| no. of reflections measured                   | 22584                                                                          | 23304                                                                          |
| unique data ( <i>R</i> <sub>int</sub> )       | 5350 (0.0640)                                                                  | 5538 (0.0167)                                                                  |
| data / restraint / parameters                 | 5350 / 0 / 271                                                                 | 5538 / 0 / 271                                                                 |
| <i>R</i> 1 ( <i>I</i> > 2.0σ( <i>I</i> ))     | 0.0650                                                                         | 0.0145                                                                         |
| <i>wR</i> 2 ( <i>I</i> > 2.0σ( <i>I</i> ))    | 0.1238                                                                         | 0.0359                                                                         |
| <i>R</i> 1 (all data)                         | 0.0707                                                                         | 0.0177                                                                         |
| <i>wR</i> 2 (all data)                        | 0.1280                                                                         | 0.0366                                                                         |
| GOF on <i>F</i> <sup>2</sup>                  | 1.242                                                                          | 1.030                                                                          |
| Δρ, e Å <sup>-3</sup>                         | 3.38, -1.99                                                                    | 0.33, -0.35                                                                    |

a)  $R1 = (\sum ||Fo| - |Fc||) / (\sum |Fo|)$     b)  $wR2 = [\{\sum w(Fo^2 - Fc^2)^2\} / \{\sum w(Fo^4)\}]^{1/2}$



**Table S1.** (continued)

|                                                     | <b>3a</b>                                                                        | <b>4a</b>                                                         |
|-----------------------------------------------------|----------------------------------------------------------------------------------|-------------------------------------------------------------------|
| empirical formula                                   | C <sub>52</sub> H <sub>88</sub> Cl <sub>14</sub> N <sub>10</sub> Ta <sub>4</sub> | C <sub>15</sub> H <sub>12</sub> Cl <sub>3</sub> N <sub>4</sub> Ta |
| formula weight                                      | 2073.47                                                                          | 535.59                                                            |
| crystal system                                      | <i>triclinic</i>                                                                 | <i>monoclinic</i>                                                 |
| space group                                         | <i>P</i> $\bar{1}$ (No. 2)                                                       | <i>P</i> 2 <sub>1</sub> / <i>n</i> (No. 14)                       |
| <i>a</i> , Å                                        | 8.9723                                                                           | 8.3470(11)                                                        |
| <i>b</i> , Å                                        | 18.162                                                                           | 13.7603(13)                                                       |
| <i>c</i> , Å                                        | 23.217                                                                           | 14.8577(16)                                                       |
| $\alpha$ , deg.                                     | 89.6120                                                                          | -                                                                 |
| $\beta$ , deg.                                      | 79.2850                                                                          | 93.947(5)                                                         |
| $\gamma$ , deg.                                     | 89.9550                                                                          | -                                                                 |
| <i>V</i> , Å <sup>3</sup>                           | 3717.3                                                                           | 1702.5(3)                                                         |
| <i>Z</i>                                            | 2                                                                                | 4                                                                 |
| <i>D</i> <sub>calcd</sub> , g/cm <sup>3</sup>       | 1.852                                                                            | 2.089                                                             |
| $\mu$ [Mo- <i>K</i> $\alpha$ ], mm <sup>-1</sup>    | 6.401                                                                            | 6.919                                                             |
| <i>T</i> , K                                        | 113(2)                                                                           | 113(2)                                                            |
| crystal size, mm                                    | 0.20 × 0.20 × 0.20                                                               | 0.30 × 0.26 × 0.25                                                |
| $\theta$ range for data collection (deg.)           | 3.20 to 27.40                                                                    | 3.10 to 27.48                                                     |
| no. of reflections measured                         | 32110                                                                            | 15938                                                             |
| unique data ( <i>R</i> <sub>int</sub> )             | 16029 (0.0481)                                                                   | 3862 (0.0451)                                                     |
| data / restraint / parameters                       | 16029 / 56 / 718                                                                 | 3862 / 0 / 208                                                    |
| <i>R</i> 1 ( <i>I</i> > 2.0 $\sigma$ ( <i>I</i> ))  | 0.0625                                                                           | 0.0632                                                            |
| <i>wR</i> 2 ( <i>I</i> > 2.0 $\sigma$ ( <i>I</i> )) | 0.1445                                                                           | 0.1351                                                            |
| <i>R</i> 1 (all data)                               | 0.1243                                                                           | 0.0669                                                            |
| <i>wR</i> 2 (all data)                              | 0.1692                                                                           | 0.1383                                                            |
| GOF on <i>F</i> <sup>2</sup>                        | 0.966                                                                            | 1.176                                                             |
| $\Delta\rho$ , e Å <sup>-3</sup>                    | 3.41, -0.96                                                                      | 3.40, -3.66                                                       |

a)  $R1 = (\sum||Fo| - |Fc|)| / (\sum|Fo|)$     b)  $wR2 = [\{\sum w(Fo^2 - Fc^2)^2\} / \{\sum w(Fo^4)\}]^{1/2}$

**Table S1.** (continued)

|                                                     | <b>4b</b>                                                         | <b>5a·CH<sub>2</sub>Cl<sub>2</sub></b>                              |
|-----------------------------------------------------|-------------------------------------------------------------------|---------------------------------------------------------------------|
| empirical formula                                   | C <sub>15</sub> H <sub>12</sub> Cl <sub>3</sub> N <sub>4</sub> Nb | C <sub>24</sub> H <sub>26</sub> Cl <sub>6</sub> N <sub>4</sub> RhTa |
| formula weight                                      | 447.55                                                            | 867.07                                                              |
| crystal system                                      | <i>monoclinic</i>                                                 | <i>triclinic</i>                                                    |
| space group                                         | <i>P2<sub>1</sub>/n</i> (No. 14)                                  | <i>P<math>\bar{1}</math></i> (No. 2)                                |
| <i>a</i> , Å                                        | 8.334(2)                                                          | 10.2852(18)                                                         |
| <i>b</i> , Å                                        | 13.735(4)                                                         | 10.4153(17)                                                         |
| <i>c</i> , Å                                        | 14.794(4)                                                         | 14.428(3)                                                           |
| $\alpha$ , deg.                                     | -                                                                 | 105.088(3)                                                          |
| $\beta$ , deg.                                      | 93.159(7)                                                         | 103.114(3)                                                          |
| $\gamma$ , deg.                                     | -                                                                 | 91.360(3)                                                           |
| <i>V</i> , Å <sup>3</sup>                           | 1690.9(8)                                                         | 1447.7(5)                                                           |
| <i>Z</i>                                            | 4                                                                 | 2                                                                   |
| <i>D</i> <sub>calcd</sub> , g/cm <sup>3</sup>       | 1.758                                                             | 1.989                                                               |
| $\mu$ [Mo- <i>K</i> $\alpha$ ], mm <sup>-1</sup>    | 1.188                                                             | 4.914                                                               |
| <i>T</i> , K                                        | 113(2)                                                            | 113(2)                                                              |
| crystal size, mm                                    | 0.12 × 0.04 × 0.02                                                | 0.09 × 0.03 × 0.01                                                  |
| $\theta$ range for data collection (deg.)           | 3.10 to 27.50                                                     | 3.00 to 27.50                                                       |
| no. of reflections measured                         | 23073                                                             | 25103                                                               |
| unique data ( <i>R</i> <sub>int</sub> )             | 3885 (0.0525)                                                     | 6609 (0.0370)                                                       |
| data / restraint / parameters                       | 3885 / 0 / 208                                                    | 6609 / 0 / 325                                                      |
| <i>R</i> 1 ( <i>I</i> > 2.0 $\sigma$ ( <i>I</i> ))  | 0.0323                                                            | 0.0255                                                              |
| <i>wR</i> 2 ( <i>I</i> > 2.0 $\sigma$ ( <i>I</i> )) | 0.0642                                                            | 0.0416                                                              |
| <i>R</i> 1 (all data)                               | 0.0464                                                            | 0.0391                                                              |
| <i>wR</i> 2 (all data)                              | 0.0698                                                            | 0.0443                                                              |
| GOF on <i>F</i> <sup>2</sup>                        | 1.109                                                             | 1.009                                                               |
| $\Delta\rho$ , e Å <sup>-3</sup>                    | 0.47, -0.51                                                       | 0.67, -0.88                                                         |

a)  $R1 = (\sum||Fo| - |Fc|)| / (\sum|Fo|)$     b)  $wR2 = [\{\sum w(Fo^2 - Fc^2)^2\} / \{\sum w(Fo^4)\}]^{1/2}$

**Table S1.** (continued)

| <b>5b·CH<sub>2</sub>Cl<sub>2</sub></b>              |                                                                     |
|-----------------------------------------------------|---------------------------------------------------------------------|
| empirical formula                                   | C <sub>24</sub> H <sub>26</sub> Cl <sub>6</sub> N <sub>4</sub> NbRh |
| formula weight                                      | 779.03                                                              |
| crystal system                                      | <i>triclinic</i>                                                    |
| space group                                         | <i>P</i> $\bar{1}$ (No. 2)                                          |
| <i>a</i> , Å                                        | 10.3047(9)                                                          |
| <i>b</i> , Å                                        | 10.4035(10)                                                         |
| <i>c</i> , Å                                        | 14.4157(14)                                                         |
| $\alpha$ , deg.                                     | 105.493(2)                                                          |
| $\beta$ , deg.                                      | 102.8873(19)                                                        |
| $\gamma$ , deg.                                     | 91.1763(16)                                                         |
| <i>V</i> , Å <sup>3</sup>                           | 1446.5(2)                                                           |
| <i>Z</i>                                            | 2                                                                   |
| <i>D</i> <sub>calcd</sub> , g/cm <sup>3</sup>       | 1.788                                                               |
| $\mu$ [Mo- <i>K</i> $\alpha$ ], mm <sup>-1</sup>    | 1.541                                                               |
| <i>T</i> , K                                        | 113(2)                                                              |
| crystal size, mm                                    | 0.14 × 0.10 × 0.10                                                  |
| $\theta$ range for data collection (deg.)           | 3.00 to 27.50                                                       |
| no. of reflections measured                         | 24040                                                               |
| unique data ( <i>R</i> <sub>int</sub> )             | 6624 (0.0266)                                                       |
| data / restraint / parameters                       | 6624 / 0 / 325                                                      |
| <i>R</i> 1 ( <i>I</i> > 2.0 $\sigma$ ( <i>I</i> ))  | 0.0198                                                              |
| <i>wR</i> 2 ( <i>I</i> > 2.0 $\sigma$ ( <i>I</i> )) | 0.0516                                                              |
| <i>R</i> 1 (all data)                               | 0.0235                                                              |
| <i>wR</i> 2 (all data)                              | 0.0523                                                              |
| GOF on <i>F</i> <sup>2</sup>                        | 1.080                                                               |
| $\Delta\rho$ , e Å <sup>-3</sup>                    | 0.91, -0.85                                                         |

a)  $R1 = (\sum||Fo| - |Fc||) / (\sum|Fo|)$     b)  $wR2 = [\{\sum w(Fo^2 - Fc^2)^2\} / \{\sum w(Fo^4)\}]^{1/2}$
